# Supplementary material for: Phenotypic flexibility of energetics in acclimated Siberian hamsters has a narrower scope in winter than in summer
Source: PubMed Central journal article supplement (PMC4791479; doi:10.1007/s00360-016-0959-3), 2016-01-23
Supplement: 360_2016_959_MOESM1_ESM.pdf [file 360_2016_959_MOESM1_ESM.pdf]

Appendix 1.

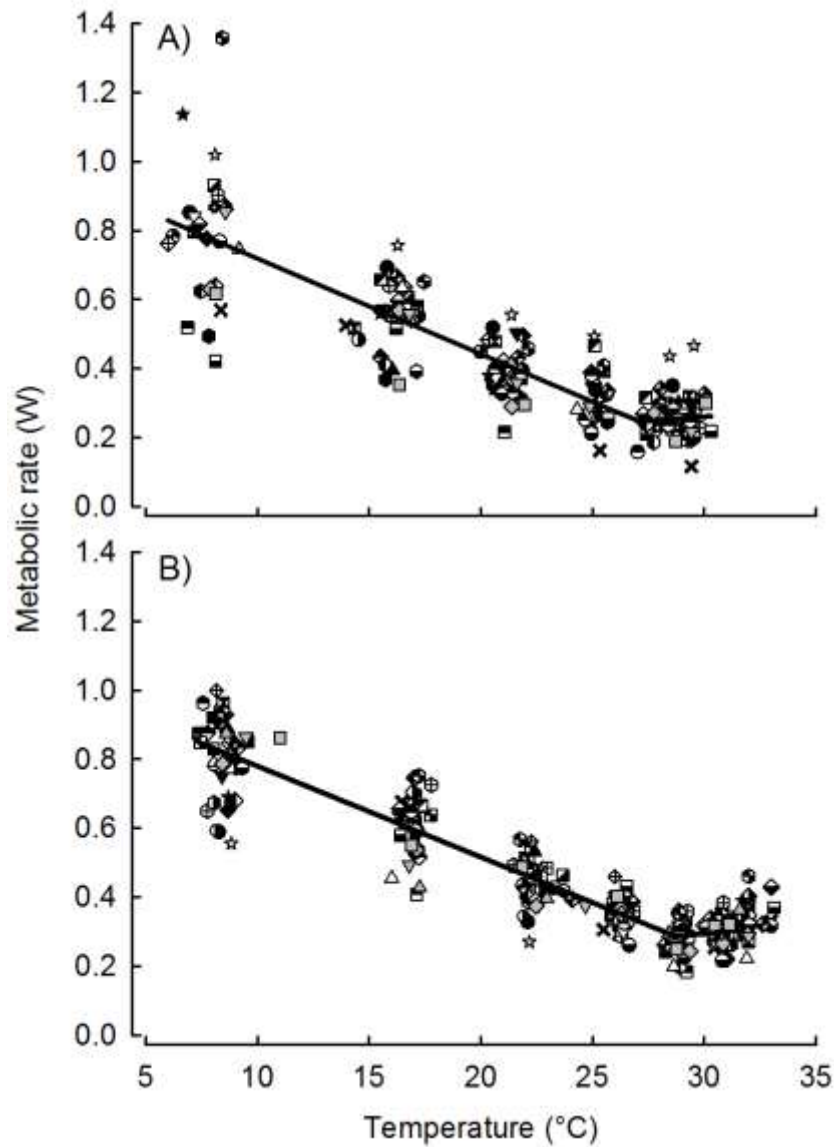

Figure S1. Metabolic rate as a function of ambient temperature ( $T_a$ ) for Siberian hamsters *Phodopus sungorus* acclimated for 3 months to winter- (A) and summer-like conditions (B; see the text for the details of acclimation procedure). In winter we successfully collected data for 39, while in summer for 40 individuals. In winter lower critical temperature ( $T_{LC}$ ) was at  $26.9 \pm 0.3^\circ\text{C}$ , while in summer  $T_{LC} = 28.6 \pm 0.2^\circ\text{C}$ . The regression lines were fitted using least-squares method, and for  $T_a$ 's  $< T_{LC}$  they were described by the following equations: for winter –  $\text{MR (W)} = 1.00 - 0.028 T_a (^\circ\text{C})$ ,  $r^2 = 0.66$ ; for summer –  $\text{MR (W)} = 1.04 - 0.026 T_a (^\circ\text{C})$ ,  $r^2 = 0.84$ . Note that each symbol represents different individual and that in each season one symbol indicates the same individual.

Table 1a. Body mass (g) of Siberian hamsters *Phodopus sungorus* randomly assigned to groups which were acclimated in different order to  $T_a$ 's during winter and summer series of experiments. Body mass of individuals within group was compared using Friedman repeated measures test with Wilcoxon pairwise test for post-hoc comparisons. Values are mean  $\pm$  SD, N – number of animals in each group,  $\chi^2$  – value of the test statistics, superscript letters indicate statistical differences at  $P < 0.05$ .

| Season | Order of acclimation $T_a$ 's ( $^{\circ}$ C) | Acclimation                     |                                 |                                 | N | $\chi^2$ | P      |
|--------|-----------------------------------------------|---------------------------------|---------------------------------|---------------------------------|---|----------|--------|
|        |                                               | Initial                         | First                           | Second                          |   |          |        |
| Winter | 10-10-20                                      | 30.15 $\pm$ 3.46 <sup>a,b</sup> | 28.05 $\pm$ 3.17 <sup>a,c</sup> | 26.05 $\pm$ 2.57 <sup>b,c</sup> | 6 | 11.51    | <0.001 |
|        | 10-10-28                                      | 30.40 $\pm$ 4.79 <sup>a</sup>   | 28.56 $\pm$ 3.85 <sup>a</sup>   | 28.60 $\pm$ 3.74                | 6 | 6.00     | 0.052  |
|        | 10-20-10                                      | 32.49 $\pm$ 3.29 <sup>a</sup>   | 29.85 $\pm$ 1.99 <sup>a</sup>   | 29.92 $\pm$ 1.69                | 7 | 3.50     | 0.192  |
|        | 10-20-28                                      | 33.67 $\pm$ 3.38                | 34.63 $\pm$ 5.68                | 32.53 $\pm$ 4.62                | 5 | 3.29     | 0.182  |
|        | 10-28-10                                      | 32.88 $\pm$ 2.52                | 31.29 $\pm$ 2.93                | 29.73 $\pm$ 3.56                | 5 | 7.12     | 0.024  |
|        | 10-28-20                                      | 30.20 $\pm$ 2.58 <sup>a,b</sup> | 27.69 $\pm$ 1.62 <sup>a</sup>   | 27.50 $\pm$ 2.25 <sup>b</sup>   | 6 | 8.91     | 0.005  |
| Summer | 20-10-20                                      | 39.60 $\pm$ 4.16                | 40.95 $\pm$ 4.78                | 40.34 $\pm$ 3.38                | 7 | 3.50     | 0.192  |
|        | 20-10-28                                      | 41.29 $\pm$ 5.10                | 41.13 $\pm$ 3.92                | 42.91 $\pm$ 4.72                | 6 | 2.11     | 0.429  |
|        | 20-20-10                                      | 38.38 $\pm$ 1.25                | 39.64 $\pm$ 2.18                | 40.34 $\pm$ 1.70                | 5 | 4.42     | 0.124  |
|        | 20-20-28                                      | 39.31 $\pm$ 3.13                | 39.31 $\pm$ 5.98                | 40.93 $\pm$ 7.39                | 6 | 4.05     | 0.142  |
|        | 20-28-10                                      | 41.35 $\pm$ 1.06                | 40.60 $\pm$ 1.59                | 41.16 $\pm$ 1.29                | 5 | 0.96     | 0.691  |
|        | 20-28-20                                      | 40.61 $\pm$ 5.04                | 41.00 $\pm$ 4.22                | 41.36 $\pm$ 3.48                | 7 | 0.98     | 0.620  |

Table 2a. Basal metabolic rate (W) of Siberian hamsters *Phodopus sungorus* randomly assigned to groups which were acclimated in different order to  $T_a$ 's during winter and summer series of experiments. Basal metabolic rate of individuals within each group was compared using Friedman repeated measures test with Wilcoxon pairwise test for post-hoc comparisons. Values are mean  $\pm$  SD, N – number of animals in each group,  $\chi^2$  – value of the test statistics, superscript letters indicate statistical differences at  $P < 0.05$ .

| Season | Order of acclimation $T_a$ 's ( $^{\circ}$ C) | Acclimation                  |                              |                                | N | $\chi^2$ | P     |
|--------|-----------------------------------------------|------------------------------|------------------------------|--------------------------------|---|----------|-------|
|        |                                               | Initial                      | First                        | Second                         |   |          |       |
| Winter | 10-10-20                                      | 0.26 $\pm$ 0.04 <sup>a</sup> | 0.21 $\pm$ 0.04 <sup>a</sup> | 0.21 $\pm$ 0.02                | 6 | 6.00     | 0.052 |
|        | 10-10-28                                      | 0.27 $\pm$ 0.05              | 0.25 $\pm$ 0.04              | 0.22 $\pm$ 0.05                | 6 | 4.05     | 0.142 |
|        | 10-20-10                                      | 0.25 $\pm$ 0.02              | 0.21 $\pm$ 0.05              | 0.26 $\pm$ 0.01                | 7 | 5.18     | 0.085 |
|        | 10-20-28                                      | 0.26 $\pm$ 0.03              | 0.24 $\pm$ 0.04              | 0.24 $\pm$ 0.03                | 5 | 0.96     | 0.691 |
|        | 10-28-10                                      | 0.27 $\pm$ 0.05              | 0.23 $\pm$ 0.04              | 0.27 $\pm$ 0.03                | 5 | 2.50     | 0.367 |
|        | 10-28-20                                      | 0.25 $\pm$ 0.02 <sup>a</sup> | 0.22 $\pm$ 0.01 <sup>a</sup> | 0.24 $\pm$ 0.02                | 6 | 6.00     | 0.052 |
| Summer | 20-10-20                                      | 0.31 $\pm$ 0.04              | 0.33 $\pm$ 0.05 <sup>a</sup> | 0.28 $\pm$ 0.01 <sup>a</sup>   | 7 | 4.34     | 0.112 |
|        | 20-10-28                                      | 0.30 $\pm$ 0.03              | 0.34 $\pm$ 0.04              | 0.28 $\pm$ 0.02                | 6 | 4.05     | 0.142 |
|        | 20-20-10                                      | 0.30 $\pm$ 0.01              | 0.28 $\pm$ 0.02              | 0.38 $\pm$ 0.05                | 5 | 4.81     | 0.093 |
|        | 20-20-28                                      | 0.29 $\pm$ 0.03 <sup>a</sup> | 0.30 $\pm$ 0.04 <sup>b</sup> | 0.25 $\pm$ 0.03 <sup>a,b</sup> | 6 | 8.91     | 0.006 |
|        | 20-28-10                                      | 0.30 $\pm$ 0.01              | 0.28 $\pm$ 0.02              | 0.33 $\pm$ 0.02                | 5 | 5.96     | 0.004 |
|        | 20-28-20                                      | 0.30 $\pm$ 0.04              | 0.30 $\pm$ 0.02              | 0.30 $\pm$ 0.03                | 7 | 0.14     | 0.964 |

Table 3a. Facultative nonshivering thermogenesis (W) of Siberian hamsters *Phodopus sungorus* randomly assigned to groups which were acclimated in different order to  $T_a$ 's during winter and summer series of experiments. Body

masses within each order of acclimation were compared using Friedman repeated measures test with Wilcoxon pairwise test for post-hoc comparisons. Values are mean  $\pm$  SD, N – number of animals in each group,  $\chi^2$  – value of the test statistics, superscript letters indicate statistical differences at  $P < 0.05$ .

| Season | Order of acclimation $T_a$ 's ( $^{\circ}\text{C}$ ) | Acclimation                    |                                |                                | N | $\chi^2$ | P      |
|--------|------------------------------------------------------|--------------------------------|--------------------------------|--------------------------------|---|----------|--------|
|        |                                                      | Initial                        | First                          | Second                         |   |          |        |
| Winter | 10-10-20                                             | 1.19 $\pm$ 0.03 <sup>a</sup>   | 0.93 $\pm$ 0.06 <sup>a,b</sup> | 1.20 $\pm$ 0.15 <sup>b</sup>   | 6 | 8.60     | 0.008  |
|        | 10-10-28                                             | 1.16 $\pm$ 0.13 <sup>a,b</sup> | 0.62 $\pm$ 0.14 <sup>a,c</sup> | 0.91 $\pm$ 0.16 <sup>b,c</sup> | 6 | 11.51    | <0.001 |
|        | 10-20-10                                             | 1.30 $\pm$ 0.19 <sup>a</sup>   | 0.95 $\pm$ 0.19 <sup>a</sup>   | 1.27 $\pm$ 0.23                | 7 | 7.42     | 0.021  |
|        | 10-20-28                                             | 1.18 $\pm$ 0.07                | 0.94 $\pm$ 0.14                | 0.86 $\pm$ 0.12                | 5 | 7.12     | 0.024  |
|        | 10-28-10                                             | 1.28 $\pm$ 0.04                | 0.45 $\pm$ 0.12                | 1.12 $\pm$ 0.36                | 5 | 7.12     | 0.024  |
|        | 10-28-20                                             | 1.16 $\pm$ 0.11 <sup>a</sup>   | 0.58 $\pm$ 0.24 <sup>a</sup>   | 0.95 $\pm$ 0.21                | 6 | 6.65     | 0.029  |
| Summer | 20-10-20                                             | 0.81 $\pm$ 0.27 <sup>a</sup>   | 1.13 $\pm$ 0.22 <sup>a,b</sup> | 0.88 $\pm$ 0.25 <sup>b</sup>   | 7 | 7.70     | 0.016  |
|        | 20-10-28                                             | 0.76 $\pm$ 0.22 <sup>a,b</sup> | 1.25 $\pm$ 0.32 <sup>a,c</sup> | 0.66 $\pm$ 0.17 <sup>b,c</sup> | 6 | 11.51    | <0.001 |
|        | 20-20-10                                             | 0.82 $\pm$ 0.19                | 0.68 $\pm$ 0.18                | 1.07 $\pm$ 0.18                | 5 | 4.81     | 0.093  |
|        | 20-20-28                                             | 0.74 $\pm$ 0.15 <sup>a</sup>   | 0.78 $\pm$ 0.31                | 0.51 $\pm$ 0.07 <sup>a</sup>   | 6 | 4.05     | 0.142  |
|        | 20-28-10                                             | 0.77 $\pm$ 0.19                | 0.63 $\pm$ 0.20                | 1.04 $\pm$ 0.27                | 5 | 5.96     | 0.004  |
|        | 20-28-20                                             | 0.82 $\pm$ 0.26 <sup>a</sup>   | 0.58 $\pm$ 0.21 <sup>a</sup>   | 0.69 $\pm$ 0.27                | 7 | 5.74     | 0.051  |

Table 4a. Minimum thermal conductance ( $\text{mW}^{\circ}\text{C}^{-1}\text{cm}^{-2}$ ) of Siberian hamsters *Phodopus sungorus* randomly assigned to groups which were acclimated in different order to  $T_a$ 's during winter and summer series of experiments. Minimal thermal conductance of individuals within each group was compared using Friedman repeated measures test with Wilcoxon pairwise test for post-hoc comparisons. Values are mean  $\pm$  SD, N – number of animals in each group,  $\chi^2$  – value of the test statistics, superscript letters indicate statistical differences at  $P < 0.05$ .

| Season | Order of acclimation $T_a$ 's ( $^{\circ}\text{C}$ ) | Acclimation     |                 |                 | N | $\chi^2$ | P     |
|--------|------------------------------------------------------|-----------------|-----------------|-----------------|---|----------|-------|
|        |                                                      | Initial         | First           | Second          |   |          |       |
| Winter | 10-10-20                                             | 0.25 $\pm$ 0.07 | 0.24 $\pm$ 0.04 | 0.22 $\pm$ 0.10 | 6 | 2.11     | 0.429 |
|        | 10-10-28                                             | 0.25 $\pm$ 0.06 | 0.27 $\pm$ 0.02 | 0.32 $\pm$ 0.12 | 6 | 2.11     | 0.429 |
|        | 10-20-10                                             | 0.27 $\pm$ 0.04 | 0.24 $\pm$ 0.09 | 0.26 $\pm$ 0.05 | 7 | 0.14     | 0.964 |
|        | 10-20-28                                             | 0.26 $\pm$ 0.04 | 0.31 $\pm$ 0.07 | 0.26 $\pm$ 0.09 | 5 | 0.19     | 0.954 |
|        | 10-28-10                                             | 0.27 $\pm$ 0.03 | 0.21 $\pm$ 0.09 | 0.23 $\pm$ 0.05 | 5 | 0.19     | 0.954 |
|        | 10-28-20                                             | 0.22 $\pm$ 0.07 | 0.24 $\pm$ 0.04 | 0.22 $\pm$ 0.08 | 6 | 0.81     | 0.740 |
| Summer | 20-10-20                                             | 0.24 $\pm$ 0.05 | 0.28 $\pm$ 0.04 | 0.27 $\pm$ 0.04 | 7 | 0.70     | 0.768 |
|        | 20-10-28                                             | 0.26 $\pm$ 0.03 | 0.26 $\pm$ 0.02 | 0.26 $\pm$ 0.04 | 6 | 2.11     | 0.429 |
|        | 20-20-10                                             | 0.25 $\pm$ 0.04 | 0.24 $\pm$ 0.03 | 0.26 $\pm$ 0.03 | 5 | 0.19     | 0.954 |
|        | 20-20-28                                             | 0.25 $\pm$ 0.03 | 0.24 $\pm$ 0.02 | 0.21 $\pm$ 0.04 | 6 | 2.76     | 0.252 |
|        | 20-28-10                                             | 0.25 $\pm$ 0.02 | 0.25 $\pm$ 0.03 | 0.27 $\pm$ 0.05 | 5 | 0.19     | 0.954 |
|        | 20-28-20                                             | 0.26 $\pm$ 0.05 | 0.25 $\pm$ 0.03 | 0.25 $\pm$ 0.03 | 7 | 0.70     | 0.768 |
